# Supplementary material for: The synergetic effect of a structure-engineered mesoporous SiO2–ZnO composite for doxycycline adsorption
Source: Royal Society of Chemistry journal article supplement (doi:10.1039/c9ra08106b), 2019-01-01
Supplement: c9ra08106b1.pdf [file c9ra08106b1.pdf]

# **The synergetic effect of structure-engineered mesoporous SiO<sub>2</sub>-ZnO composite for doxycycline adsorption**

Danya Huang, Ying Zhang, Jingjing Zhang, Hongli Wang, Minggang Wang, Chen  
Wu, Daowen Cheng, Yue Chi\*, Zhankui Zhao\*

Key Laboratory of Advanced Structural Materials of Ministry of Education, College  
of Material Science and Engineering, Changchun University of Technology,  
Changchun 130012, China

\* Corresponding author. Tel.: +86 431 85716644; Fax: +86 431 85716644.

E-mail addresses: yuechi@ccut.edu.cn (Y. Chi), zhaozk@ccut.edu.cn (Z. Zhao).

## 1. Preparation of mesoporous SiO<sub>2</sub>

6 g CTAB and 0.18 g TEA dissolved in 60 g H<sub>2</sub>O at 60 °C for 1 h and simultaneously stirred at 150 rpm using a heater/magnetic stirrer. After that, a mixed solution of 16 mL of cyclohexane and 4.2 g of TEOS was added to the above solution and stirred at 60 °C for 15 h. The resulting solution was transferred into a Teflon-lined stainless-steel autoclave, which was sealed and heated at 100 °C for 10 h and naturally cooled to room temperature. The white particles were collected and washed with ethanol and deionized water, and dried under vacuum at 60 °C for 8 h. Finally, to remove PVP and obtain the adsorbent mesoporous SiO<sub>2</sub>, the as-prepared powder was calcined at 550 °C for 6 h with a heating rate of 5 °C min<sup>-1</sup>.

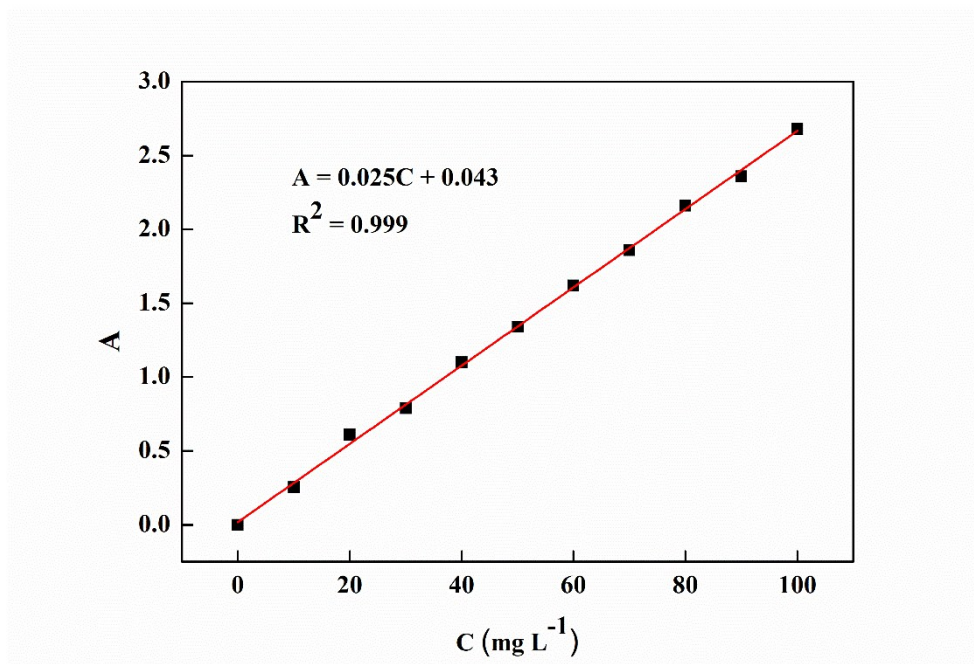

**Fig. S1** Standard curve of DOX.

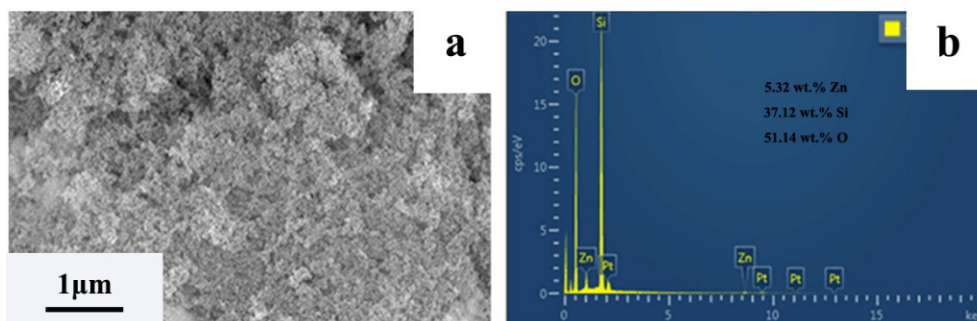

**Fig. S2** SEM image (a) and EDS spectra (b) of mesoporous SiO<sub>2</sub>-ZnO.

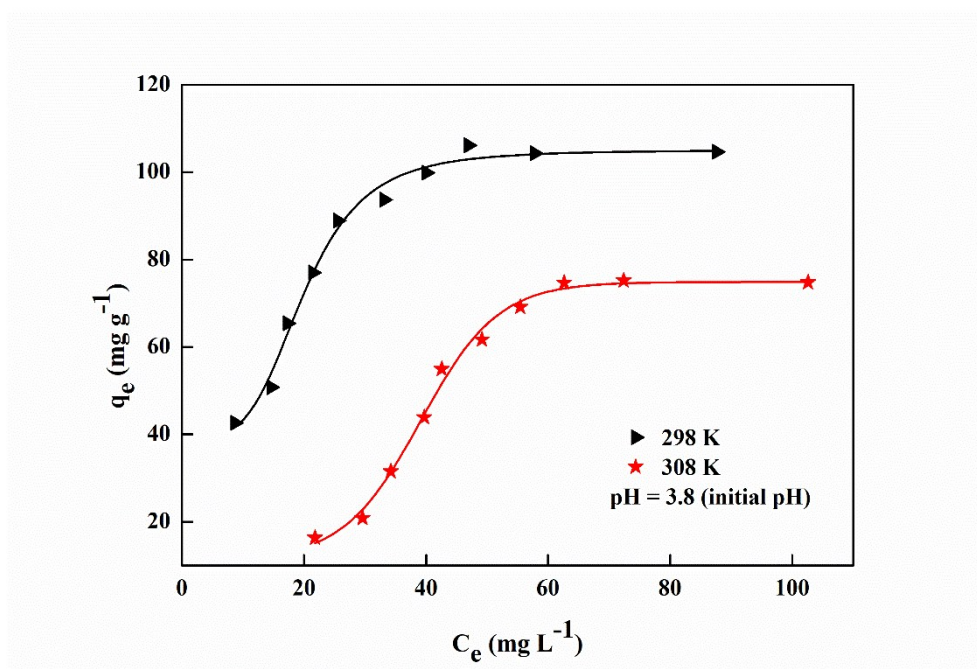

**Fig. S3** DOX sorption isotherms with mesoporous SiO<sub>2</sub>-ZnO at two different temperatures.

( $m_{\text{sorbent}} = 10 \text{ mg}$ ,  $V = 20 \text{ mL}$ ,  $C_{0(\text{DOX})} = 10\text{-}100 \text{ mg L}^{-1}$ ,  $t = 24 \text{ h}$ )

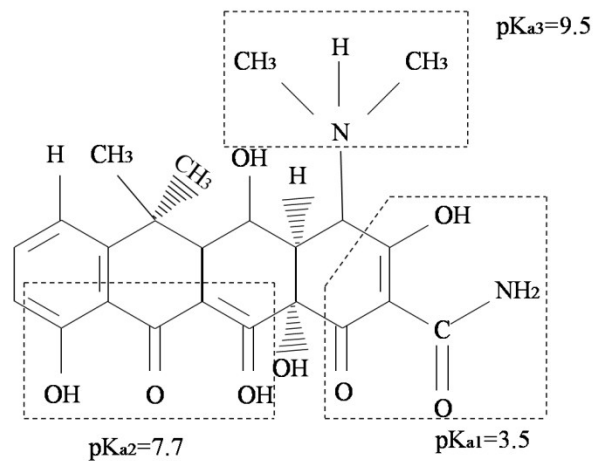

**Fig. S4** Molecular structure and physicochemical properties of DOX.

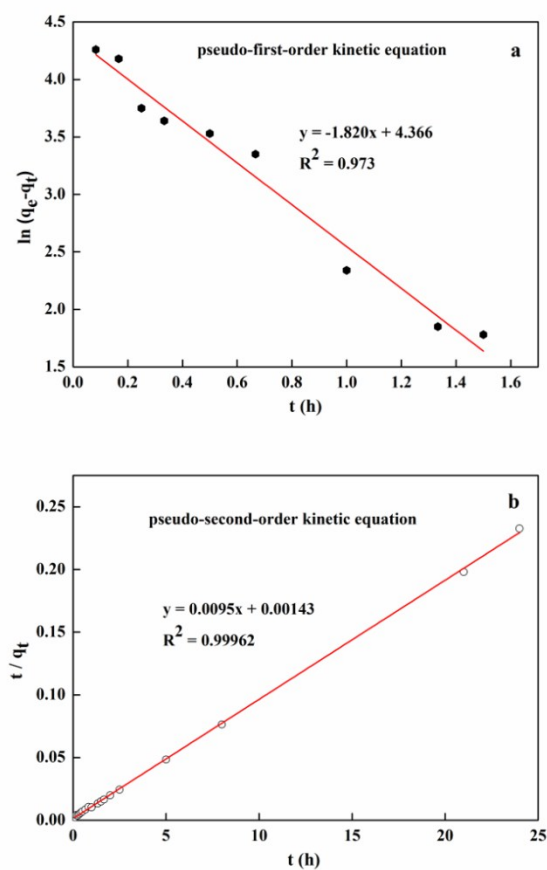

**Fig. S5** Fitting results of pseudo-first-order (a) and pseudo-second-order (b) models for DOX sorption on mesoporous SiO<sub>2</sub>-ZnO.

( $m_{\text{sorbent}} = 100 \text{ mg}$ ,  $V_{(\text{DOX})} = 200 \text{ mL}$ ,  $C_{0(\text{DOX})} = 100 \text{ mg L}^{-1}$ ,  $T = 298 \text{ K}$ , initial pH)

**Table S1** Capacities of doxycycline hydrochloride onto various adsorbents.

| Adsorbents  | Adsorption conditions | Qe (mg g <sup>-1</sup> ) | References |
|-------------|-----------------------|--------------------------|------------|
| GO-MP 298K  | initial pH            | 35.3                     | [53]       |
| MIP-HCM     | 298K,                 | 58.2                     | [54]       |
| SBC@β-FeOOH | 298K, pH=2            | 15.1                     | [55]       |
| RH700       | 318K, pH=6            | 85.2                     | [56]       |

**The Langmuir, Freundlich, Temkin and D-R isotherm equations are shown below:**

Langmuir models:

$$q_e = \frac{q_m K_L C_e}{1 + K_L C_e} \quad (1)$$

Freundlich models:

$$q_e = K_F C_e^{1/n} \quad (2)$$

Temkin model:

$$q_e = B \ln A_T + B \ln C_e \quad (3)$$

Dubinin-Radushkevich models:

$$\ln q_e = \ln q_m - \beta \varepsilon^2 \quad (4)$$

$$\varepsilon = RT \ln \left( 1 + \frac{1}{C_e} \right) \quad (5)$$

$$E = (2\beta)^{-1/2} \quad (6)$$

Where  $q_m$  (mg g<sup>-1</sup>) is the maximum adsorption capacity,  $n$  is a dimensionless number related to surface heterogeneity,  $K_F$  (mg<sup>1-n</sup> L<sup>n</sup> g<sup>-1</sup>) is Freundlich affinity

coefficient and  $K_L$  ( $L\ mg^{-1}$ ) is the Langmuir fitting parameter,  $\beta$  is a constant related to sorption energy;  $\varepsilon$  is Polanyi sorption potential, related to the sorption energy  $E$  required to move one molecule of solute from infinity to the surface of adsorbents.  $R$  is the ideals gas constant ( $8.314\ J\ mol^{-1}\ K^{-1}$ ) and  $T$  is the temperature (K).

### Model evaluation parameters

Coefficient of determination:  $R^2$  (COD)

Degree-of-freedom adjusted coefficient of determination: Adj.  $R^2$

Sum of squared residuals:

$$SSE = \sum_{i=1}^n (y_{experiment} - y_{fitting})^2 \quad (7)$$

Root mean squared error:

$$Root - MSE = \sqrt{\frac{SSE}{n}} = \sqrt{\frac{1}{n} \sum_{i=1}^n (y_{experiment} - y_{fitting})^2} \quad (8)$$

**The pseudo-first-order kinetic, pseudo-second-order kinetic, intra-particle diffusion and liquid-film diffusion equations are shown below:**

The pseudo-first-order kinetic model:

$$\ln(q_e - q_t) = \ln q_e - k_1 t \quad (9)$$

The pseudo-second-order kinetic model:

$$\frac{t}{q_t} = \frac{1}{k_2 q_e^2} + \frac{t}{q_e} \quad (10)$$

The intra-particle diffusion model:

$$q_e = k_d t^{\frac{1}{2}} + C \quad (11)$$

The liquid-film diffusion model:

$$\ln \left( 1 - \frac{q_t}{q_e} \right) = - k_f t + A \quad (12)$$

Where  $t$  is the adsorption time (h),  $q_e$  and  $q_t$  ( $\text{mg g}^{-1}$ ) are the absorption capacity at equilibrium and time  $t$ .  $k_1$  ( $\text{h}^{-1}$ ),  $k_2$  ( $\text{g mg}^{-1} \text{h}^{-1}$ ),  $k_d$  ( $\text{g mg}^{-1} \text{h}^{-0.5}$ ) and  $k_f$  ( $\text{h}^{-1}$ ) are adsorption rate constant of the pseudo-first-order kinetic, pseudo-second-order kinetic, intraparticle diffusion and liquid-film diffusion models, respectively.  $C$  is the thickness of boundary layer and  $A$  is liquid-film diffusion constant.
